# Supplementary material
Source: PubMed Central journal article supplement (PMC9743910)
Supplement: 12200_2021_1217_MOESM1_ESM.pdf [file 12200_2021_1217_MOESM1_ESM.pdf]

# Supporting Information

## Rapid thermal evaporation for cadmium selenide thin-film solar cells

Kanghua LI<sup>†</sup>, Xuétian LIN<sup>†</sup>, Boxiang SONG, Rokas KONDRITAS, Chong WANG, Yue LU, Xuke YANG, Chao CHEN (✉), Jiang TANG

<https://doi.org/10.1007/s12200-021-1217-1>

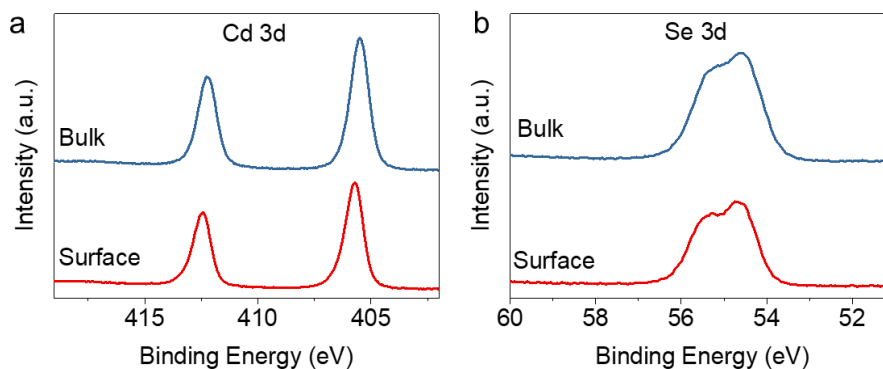

**Fig. S1** XPS spectra of Cd 3d and Se 3d in CdSe film

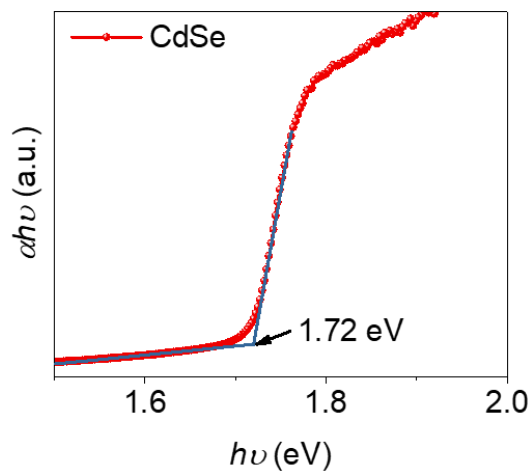

**Fig. S2** Absorption of CdSe thin film

It shows a sharp drop at 1.72 eV. The optical bandgap ( $E_g$ ) is derived from the Tauc plot [1] for direct bandgap:

$$(\alpha h\nu)^2 = A(h\nu - E_g), \quad (1)$$

where  $A$  is a constant,  $h$  is Planck's constant, and  $\nu$  is the photon frequency. The intersection of the linear segment and the horizontal axis is the width of the forbidden band.

As shown in Fig. S2, we obtain a bandgap of 1.72 eV for CdSe by extrapolating the linear region to the horizontal extension line.

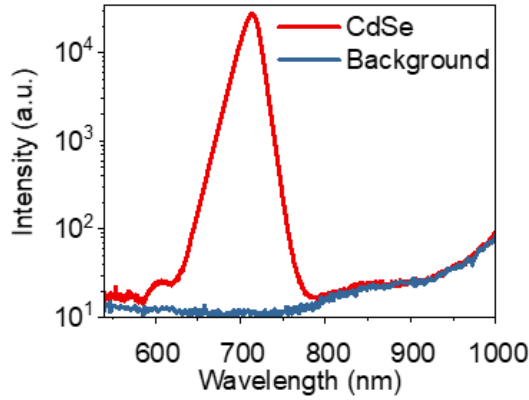

**Fig. S3** PL spectra of CdSe and background

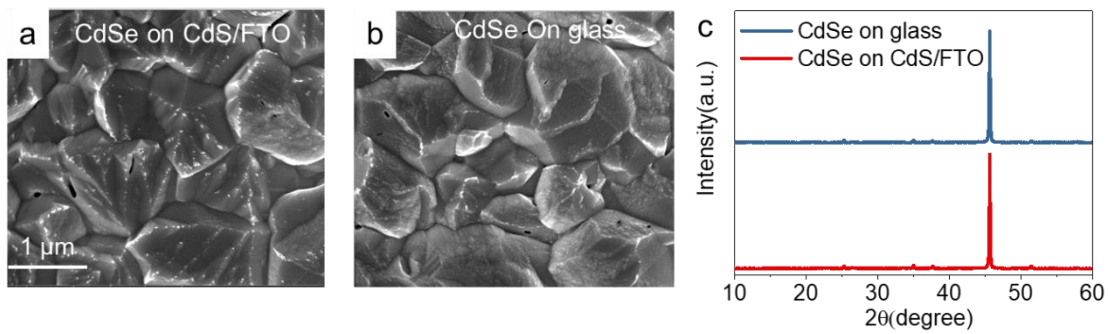

**Fig. S4** (a) and (b) SEM surface images. (c) XRD spectra of CdSe thin film on CdS/FTO and glass substrates

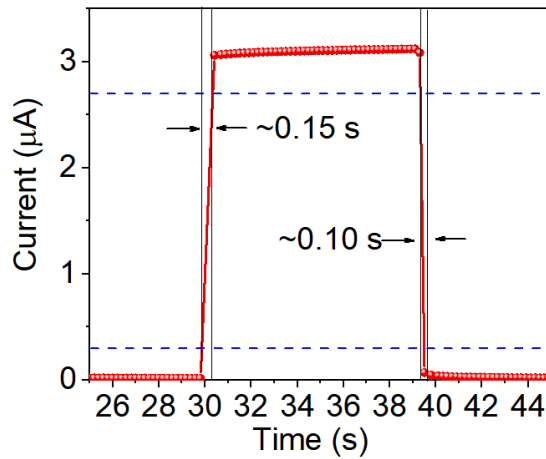

**Fig. S5** Current rise and fall durations in CdSe photo-conductance type detector under dark and 530 nm LED illumination

As shown in Fig. S5, the rise/fall time (defined as the time required to switch from 10%/90% of saturated photocurrent to 90%/10%) for the CdSe device showed [2], can be acquired directly from one photoresponse cycle, which was measured to be 0.15/0.1 s.

The conductivity calculation process:

The dark current for CdSe at a bias 1 V is 10 nA. Then, the resistance can be calculated by the following formula:

$$R = U / I = 1 \text{ V} / 10 \text{ nA} = 10^8 \Omega.$$

The surface area of the sample used to photoresponse is  $5 \times 10^{-4} \text{ cm}^2$ , and the length is 1 cm, so the conductivity is calculated by the following procedure:

$$\rho = RS / L = 10^8 \Omega \times 5 \times 10^{-4} \text{ cm}^2 / 1 \text{ cm} = 5 \times 10^4 \Omega \cdot \text{cm}$$

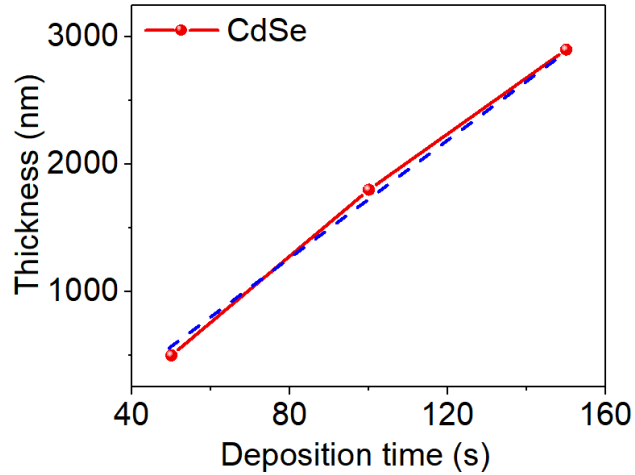

**Fig. S6** Approximately linear relationship between deposition time and thickness of CdSe film

According to Fig. S6 corresponding to different evaporation times, when evaporation times were 50, 100, and 150 s, the corresponding film thicknesses were 500, 1800, and 2900 nm respectively. The deposition time is linearly related to the thickness of CdSe film.

## References

1. Lu S, Zhao Y, Chen C, Zhou Y, Li D, Li K, Chen W, Wen X, Wang C, Kondrotas R, Lowe N, Tang J. Sb<sub>2</sub>Se<sub>3</sub> thin-film photovoltaics using aqueous solution sprayed SnO<sub>2</sub> as the buffer layer. *Advanced Electronic Materials*, 2018, 4(1): 1700329
2. Zhong J, Yu J, Cao L, Zhong J, Yu J, Cao L, Zeng C. High-performance polarization-sensitive photodetector based on a few-layered PdSe<sub>2</sub> nanosheet. *Nano Research*, 2020 13: 1780–1786
